# Supplementary material for: Longitudinal Secretion of Paramyxovirus RNA in the Urine of Straw-Coloured Fruit Bats (Eidolon helvum)
Source: MDPI journal article supplement (doi:10.3390/v13081654), 2021-08-20
Supplement: s1 [file s1]

**Table S1.** Paramyxovirus RNA detections and overlap between the two PCRs. †Alone = paramyxovirus RNA was detected using only the one PCR, as indicated. \*In one pool, AZ\_RMH\_9 and AZ\_RMH\_10A were detected concurrently using the same (RMH) PCR. PAR = PCR using general paramyxovirus primers, RMH = PCR using *Respirovirus-Morbillivirus-Henipavirus* specific primers.

|             | AZ_RMH_2 | AZ_RMH_9 | AZ_RMH_10<br>A | AZ_RMH_14<br>6 | AZ_RMH_162<br>A | AZ_RMH_317<br>A | Alone | Total |
|-------------|----------|----------|----------------|----------------|-----------------|-----------------|-------|-------|
| AZ_PAR_3    | 1        | 1        | 0              | 0              | 0               | 0               | 3     | 5     |
| AZ_PAR_10B  | 0        | 0        | 2              | 1              | 1               | 0               | 11    | 15    |
| AZ_PAR_44   | 0        | 0        | 0              | 0              | 0               | 0               | 2     | 2     |
| AZ_PAR_117  | 3        | 0        | 0              | 0              | 0               | 0               | 0     | 3     |
| AZ_PAR_162B | 0        | 0        | 0              | 0              | 1               | 0               | 1     | 2     |
| AZ_PAR_198  | 0        | 0        | 0              | 0              | 0               | 0               | 2     | 2     |
| AZ_PAR_292  | 0        | 0        | 0              | 0              | 0               | 0               | 2     | 2     |
| AZ_PAR_317B | 0        | 1        | 0              | 0              | 0               | 1               | 1     | 3     |
| Alone†      | 4        | 7*       | 20*            | 7              | 3               | 0               |       |       |
| Total       | 8        | 9        | 22             | 8              | 5               | 1               |       |       |

**Table S2.** Paramyxovirus sequences detected in this study. PAR = PCR using general paramyxovirus primers, RMH = PCR using *Respirovirus-Morbillivirus-Henipavirus* specific primers.

| Short name  | Full name               | GenBank<br>Accession<br>number | Accession number and name of the closest<br>relative in the NCBI database | % identity<br>with the<br>closest relative |
|-------------|-------------------------|--------------------------------|---------------------------------------------------------------------------|--------------------------------------------|
| AZ_RMH_2    | BatPV_GH_2019_U2R       | MZ393386                       | HQ660134.1 Bat Paramyxovirus Eid_hel/GH-M90a/GHA/2009 isolate             | 98.86%                                     |
| AZ_RMH_9    | BatPV_GH_2019_U9R       | MZ393385                       | JN862571.1 Eidolon helvum paramyxovirus clone U54B (L) gene               | 97.27%                                     |
| AZ_RMH_10A  | BatPV_GH_2019_U10R      | MZ393384                       | FJ971935.1 Paramyxovirus bat/GH15/2009 (L) gene                           | 98.40%                                     |
| AZ_RMH_146  | BatPV_GH_2019_U146<br>R | MZ393383                       | HQ660147.1 Bat Paramyxovirus Eid_hel/GH-M28/GHA/2009 isolate              | 99.77%                                     |
| AZ_RMH_162A | BatPV_GH_2019_U162<br>R | MZ393382                       | JN862573.1 Eidolon helvum paramyxovirus clone U51B (L) gene               | 99.54%                                     |
| AZ_RMH_317A | BatPV_GH_2019_U317<br>R | MZ393381                       | FJ971939.1 Paramyxovirus bat/GH21a/2009 (L) gene                          | 99.09%                                     |
| AZ_PAR_3    | BatPV_GH_2019_U3P       | MZ393377                       | JN648061.1 Eidolon helvum paramyxovirus clone U46B (L) gene               | 99.25%                                     |
| AZ_PAR_10B  | BatPV_GH_2019_U10P      | MZ393380                       | KF878080.1 Mumps virus strain MuVi/RW154.USA/0.70s[K]                     | 79.74%                                     |
| AZ_PAR_44   | BatPV_GH_2019_U44P      | MZ393379                       | JX051320.1 Achimota virus 2                                               | 99.62%                                     |
| AZ_PAR_117  | BatPV_GH_2019_U117<br>P | MZ393376                       | AB853096.1 Bat Paramyxovirus Eid_hel/ZFB09-32/Zambia/2009 L gene          | 98.30%                                     |
| AZ_PAR_162B | BatPV_GH_2019_U162<br>P | MZ393375                       | JN648082.1 Eidolon helvum paramyxovirus clone U68G (L) gene               | 96.80%                                     |
| AZ_PAR_198  | BatPV_GH_2019_U198<br>P | MZ393374                       | JX051320.1 Achimota virus 2                                               | 70.22%                                     |

|             |                         |          |            |                                                     |        |
|-------------|-------------------------|----------|------------|-----------------------------------------------------|--------|
| AZ_PAR_292  | BatPV_GH_2019_U292<br>P | MZ393378 | JN648056.1 | Eidolon helvum paramyxovirus<br>clone U42A (L) gene | 75.33% |
| AZ_PAR_317B | BatPV_GH_2019_U317<br>P | MZ393373 | HE647836.1 | Eidolon paramyxovirus RC09<br>partial L gene        | 97.16% |
